# Supplementary material
Source: MDPI journal article supplement (https://www.mdpi.com/2297-8739/8/11/222)
Supplement: s1 [file s1]

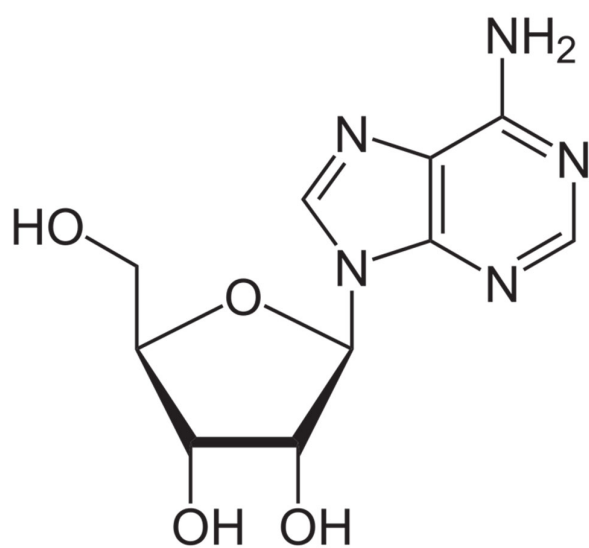

**Figure S1.** Molecular structure of Adenosine

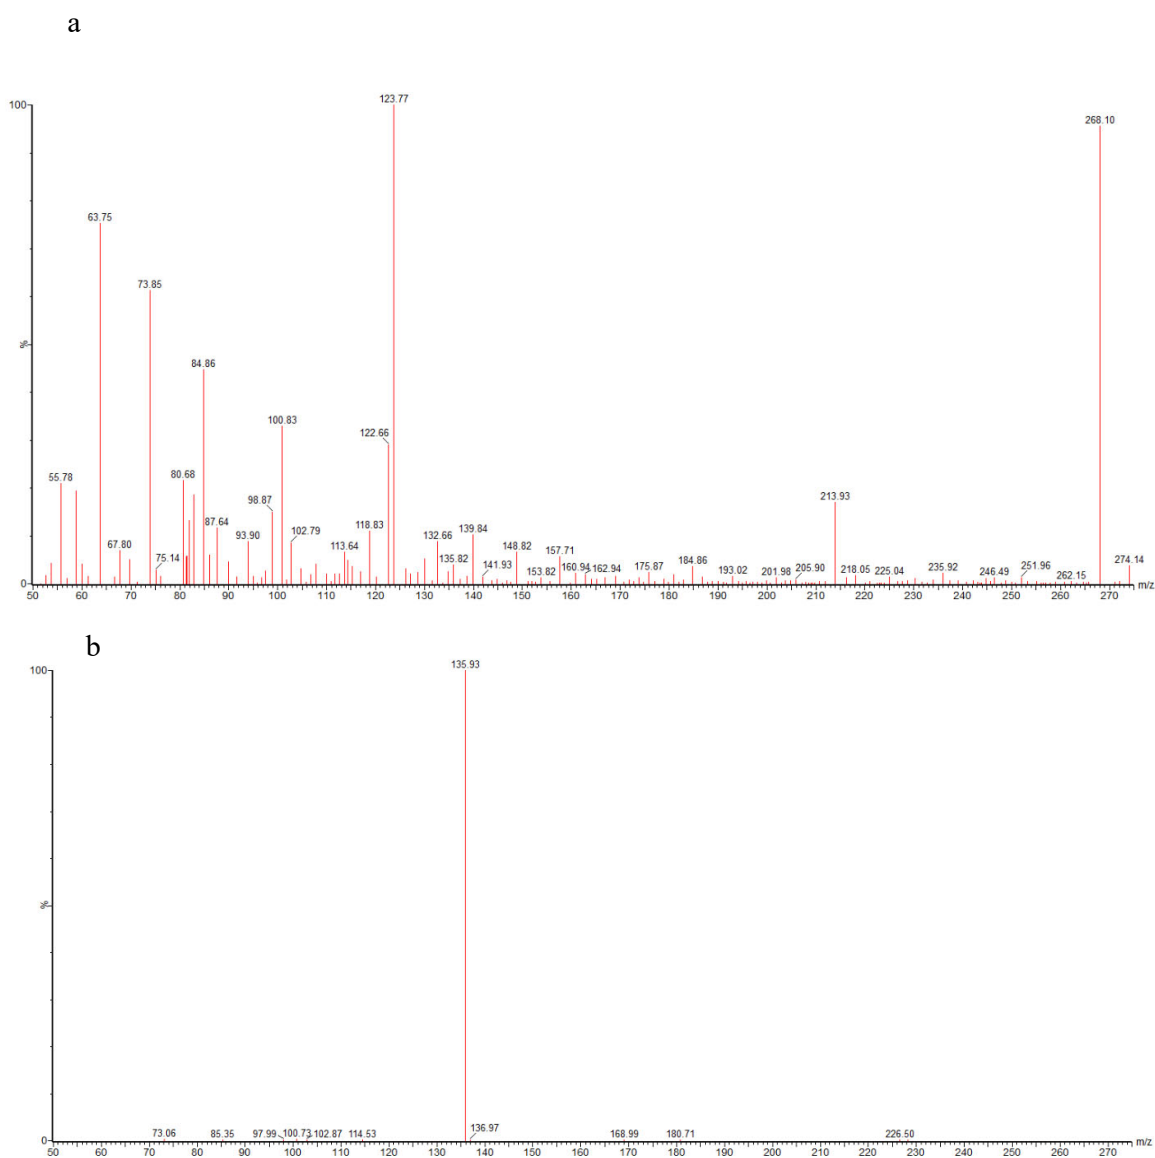

**Figure S2.** a. MS1 Scan of adenosine (10  $\mu\text{g/mL}$ , cone energy 20V) and b. Daughter scan of adenosine ( $m/z$  268, collision energy 15V)

**TableS1.** Calibration curve concentration range in  $\mu\text{M}$

| Standard<br>Level | Standard<br>Concentration |
|-------------------|---------------------------|
|                   | $\mu\text{M}$             |
| 1                 | 0.02                      |
| 2                 | 0.04                      |
| 3                 | 0.07                      |
| 4                 | 0.11                      |
| 5                 | 0.34                      |
| 6                 | 1.12                      |
| 7                 | 2.25                      |
| 8                 | 4.49                      |
| 9                 | 7.49                      |
